# Supplementary material
Source: publisher figshare collection journal article supplement (https://karger.figshare.com/ndownloader/files/20066045)
Supplement: Supplementary file 1 [file 20066045]

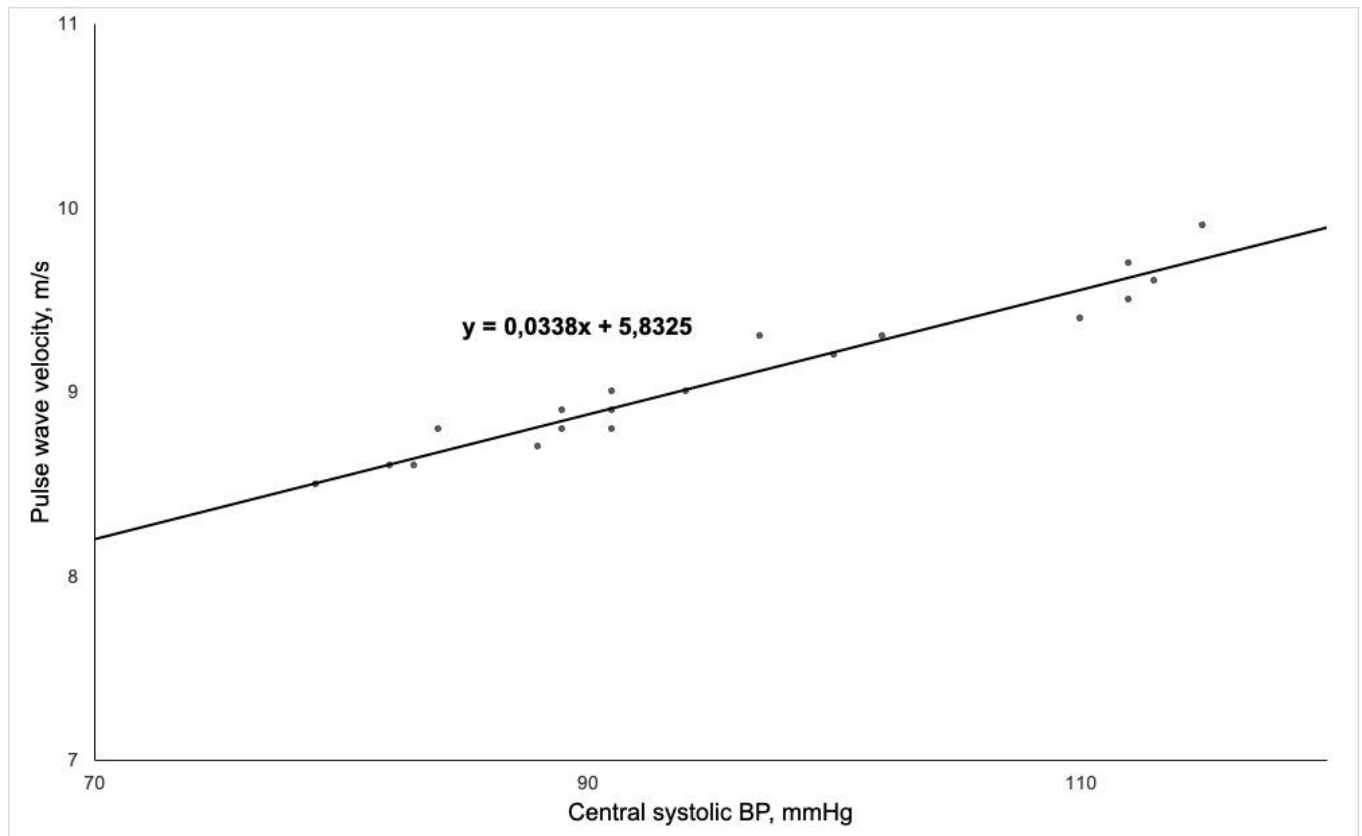

Example of aortic pulse wave velocity and central systolic blood pressure plot in one study subject.
